# Supplementary material for: Pathogenic NLRP3 mutants forms constitutively active inflammasomes resulting in immune-metabolic limitation of IL-1β production
Source: Research Square preprint supplement (doi:10.21203/rs.3.rs-2884955/v1), 2024-11-13
Supplement: Supplementary file [file d94ad2b25ecd20c13d34a102.pdf]

## **Description of Additional Supplementary Files**

File Name: Supplementary Data 1

Description: A single Excel file including data of the compounds detected in metabolomic analysis of monocytes from healthy donors and CAPS patients.

File Name: Supplementary Data 2

Description: A single Excel file including data of the compounds detected in metabolomic analysis of immortalized macrophages.
